# Supplementary material
Source: PubMed Central journal article supplement (PMC6224797)
Supplement: mmc1.pdf [file mmc1.pdf]

YMTHE, Volume 26

## **Supplemental Information**

### **PDGF Restores the Defective Phenotype of Adipose-Derived Mesenchymal Stromal Cells from Diabetic Patients**

**Vivian Capilla-González, Javier López-Beas, Natalia Escacena, Yolanda Aguilera, Antonio de la Cuesta, Rafael Ruiz-Salmerón, Franz Martín, Abdelkrim Hmadcha, and Bernat Soria**

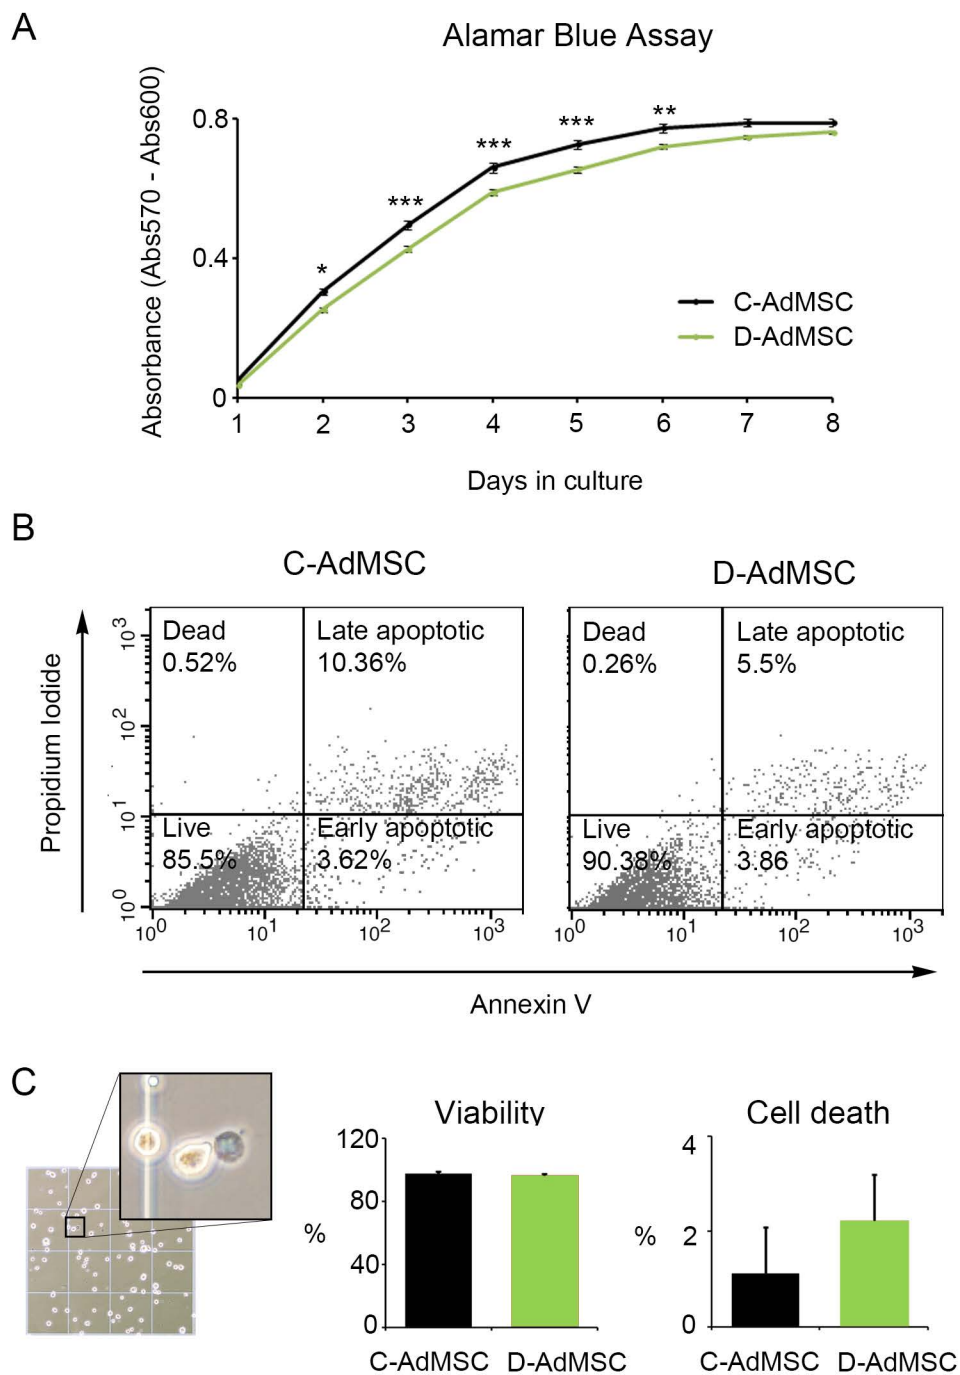

**Figure S1. Metabolic activity and viability of AdMSCs derived from T2DM patients and healthy subjects.** (A) Metabolic activity of AdMSCs was measured daily by Alamar Blue assay over an 8-day culture period. (B) Apoptosis detection using Annexin V and the non-vital dye propidium iodide and analysis by flow cytometry. (C) Optical microscopic image of the AdMSCs in a hemocytometer after trypan blue staining. Quantification of viable and dead cells is represented by bar graphs. Data are represented as mean  $\pm$  SEM. \* $p < 0.05$ , \*\* $p < 0.01$ , \*\*\* $p < 0.001$  (Two-tailed T-test, Two-way ANOVA).

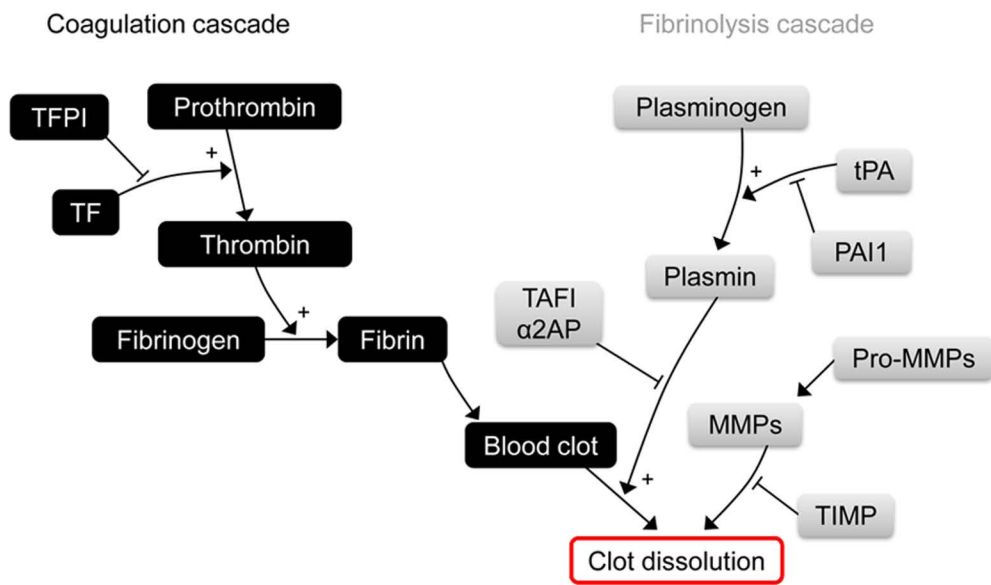

**Figure S2. Summary diagram integrating the coagulation and fibrinolysis cascades.** Coagulation and fibrinolysis cascades integrate multiple factors. Tissue Factor (TF) and Tissue Factor Pathway Inhibitor (TFPI) are key initiators of blood clotting. Metalloproteases (MMPs) and tissue inhibitors of MMPs (TIMPs) are involved in extracellular matrix degradation to favor dissolution of blood clots.  $\alpha$ 2-antiplasmin is an inhibitor of plasmin that degrades blood clots. The plasminogen activator inhibitor type 1 (PAI-1) and tissue plasminogen activator (tPA) are master regulators of the degradation of fibrin present in the blood clots.

A

| Sample            |         | PDGF-AA (pg/ml) | PDGF-BB (pg/ml) |
|-------------------|---------|-----------------|-----------------|
| Conditioned media | C-AdMSC | 0               | 0               |
|                   | D-AdMSC | 0               | 0               |
| Serum             | C-serum | 8084 ± 1029     | 563 ± 32        |
|                   | D-serum | 15458 ± 909*    | 2177 ± 1.5*     |

B

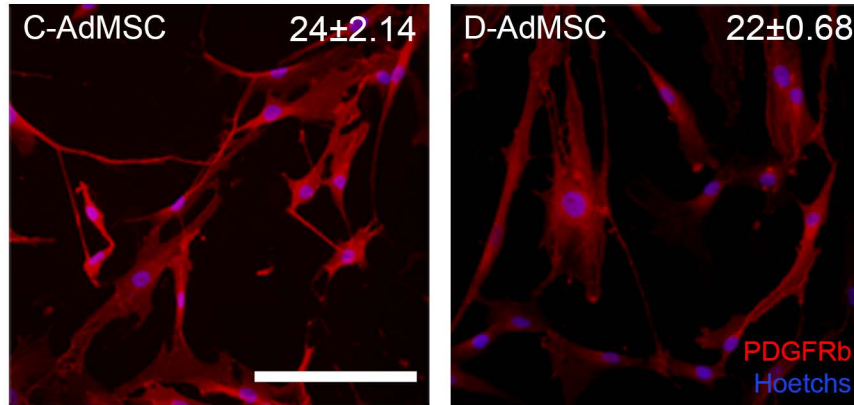

**Figure S3. Expression levels of PDGF ligand and its receptor in AdMSCs.** (A) Human PDGF-AA and PDGF-BB concentrations in the conditioned media of C-AdMSCs and D-AdMSCs, as well as in serum derived from healthy (C-serum) and diabetic (D-serum) donors. (B) Immunocytochemistry staining for PDGFR $\beta$  (red) in D-AdMSCs and C-AdMSCs. Cell nuclei were stained with Hoechst dye (blue). Fluorescence was measured as the mean gray/100 nuclei and did not reveal significant differences. Scale bar: 100  $\mu$ m. Data are represented as mean  $\pm$  SEM. \* $p < 0.05$  (Two-tailed T-test).

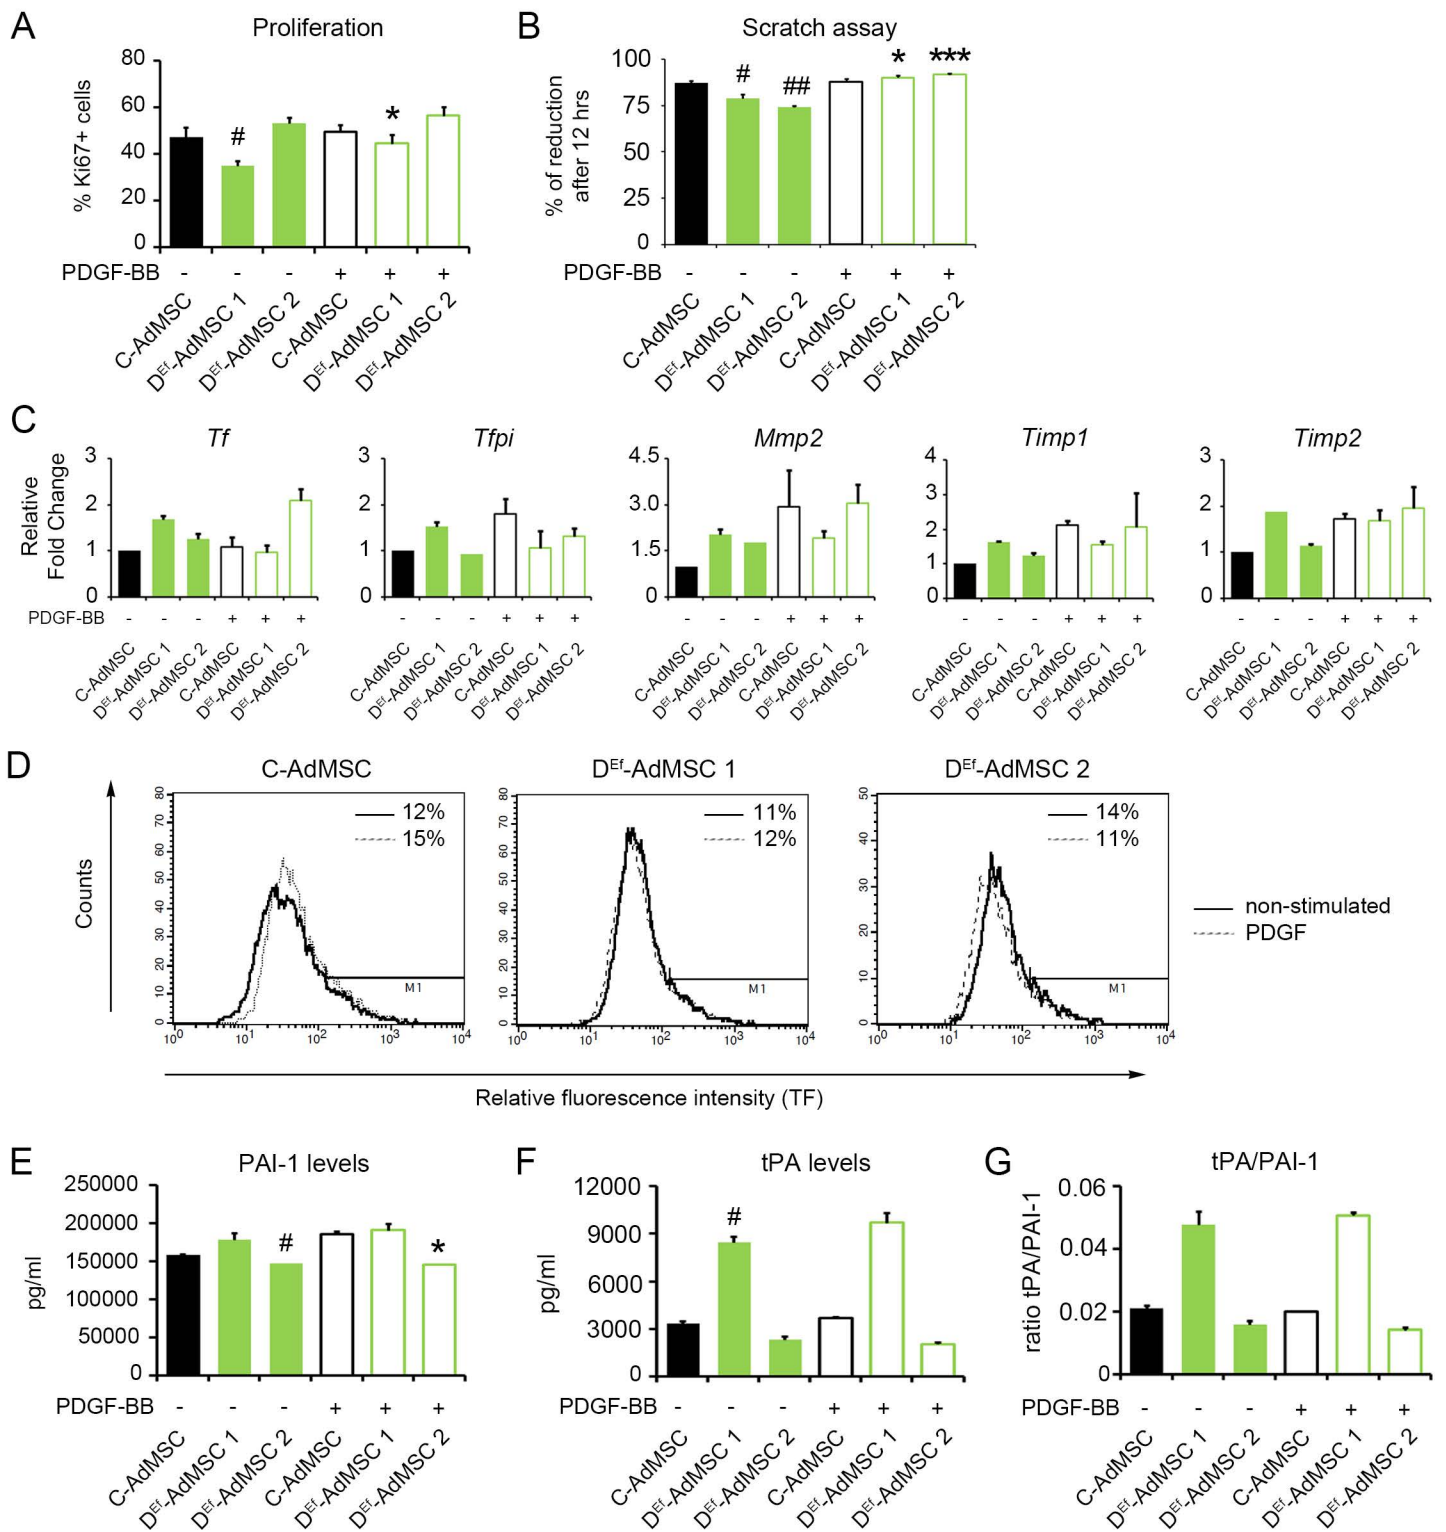

**Figure S4. Pathological phenotype of AdMSCs differs across multiple T2DM patients successfully treated with autologous cell therapy for CLI.** Data were collected from diabetic patients with CLI enrolled in the NCT01257776 trial, that did not undergo adverse reaction after AdMSCs infusion (i.e., therapeutically effective AdMSCs; DE<sup>f</sup>-AdMSCs). (A) Bar graph depicting the percentage of Ki67+ cells 5 hrs after PDGF-BB stimulation in AdMSCs derived from healthy and diabetic donors. (B) Scratch assay was performed to determine differences on migration, using medium enriched or not with PDGF-BB. Bar graph depicts the percentage of reduced scratch area after a time period of 12 hrs. (C) RT-qPCR measurements for a selected set of genes involved in coagulation and fibrinolysis. Results were normalized to the internal control Ppia and Rplp0. Results for the healthy donor without PDGF-stimulation were set as 1. (D) Flow cytometry analysis determining the percentage of AdMSCs expressing the pro-coagulant marker TF. (E) Bar graphs depicting the levels of tPA secreted in the medium by cultured AdMSCs. (F) Bar graphs depicting the levels of PAI-1 secreted in the medium by cultured AdMSCs. (G) Bar graphs depicting the tPA/PAI-1 ratio. Data are represented as mean  $\pm$  SEM. <sup>#</sup> $p < 0.05$  compared to C-AdMSCs, <sup>\*</sup> $p < 0.05$  compared to non-stimulated, <sup>##</sup> $p < 0.01$  compared to C-AdMSCs, <sup>\*\*\*</sup> $p < 0.001$  compared to non-stimulated (One-way ANOVA).

**Table S1. Information of patient samples used in this study.**

| <b>Donor</b> | <b>Condition</b> | <b>Treatment (dose of infused cells)</b> | <b>Adverse reaction</b> | <b>Sample obtained</b>   | <b>Figures where samples were used</b> |
|--------------|------------------|------------------------------------------|-------------------------|--------------------------|----------------------------------------|
| Donor 1      | healthy          | none                                     | no                      | C-AdMSC                  | 1, 2, 3, 4, 5, 6, S1, S3, S4           |
| Donor 2      | T2DM and CLI     | $5 \cdot 10^5$ cells/kg                  | yes                     | D-AdMSC                  | 1, 2, 3, 4, 5, 6, S1, S3               |
| Donor 3      | T2DM and CLI     | $5 \cdot 10^5$ cells/kg                  | no                      | D <sup>Ef</sup> -AdMSC 1 | S4                                     |
| Donor 4      | T2DM and CLI     | $5 \cdot 10^5$ cells/kg                  | no                      | D <sup>Ef</sup> -AdMSC 2 | S4                                     |

**Table S2. List of primary antibodies used in this study**

| <b>Antibody</b>             | <b>Species, type</b> | <b>Dilution</b> | <b>Application</b>                  | <b>Cat. number, manufacturer</b>         |
|-----------------------------|----------------------|-----------------|-------------------------------------|------------------------------------------|
| CD105                       | mouse IgG1 k         | 1:20            | Flow cytometry                      | 560839, BD Biosciences (San Jose, CA)    |
| CD13                        | mouse IgG1, k        | 1:20            | Flow cytometry                      | 347406, BD Biosciences                   |
| CD29                        | mouse IgG1 k         | 1:20            | Flow cytometry                      | 555443, BD Biosciences                   |
| CD31                        | mouse IgG1 k         | 1:20            | Flow cytometry                      | 555445, BD Biosciences                   |
| CD34                        | mouse IgG1 k         | 1:20            | Flow cytometry                      | 555822, BD Biosciences                   |
| CD45                        | mouse IgG1 k         | 1:20            | Flow cytometry                      | 345808, BD Biosciences                   |
| CD73                        | mouse IgG1 k         | 1:20            | Flow cytometry                      | 550257, BD Biosciences                   |
| CD90                        | mouse IgG1 k         | 1:20            | Flow cytometry                      | 555595, BD Biosciences                   |
| HLA II                      | mouse IgG2a, k       | 1:20            | Flow cytometry                      | 555558, BD Biosciences                   |
| TF                          | mouse IgG1 k         | 1:5             | Flow cytometry                      | 550312, BD Biosciences                   |
| Human nuclei                | mouse IgG1           | 1:200           | Immunocytochemistry                 | MAB1281, Millipore (Billerica, MA)       |
| Ki67                        | mouse IgG1           | 1:150           | Immunocytochemistry                 | NCL-L-Ki67-MM1, Leica (Barcelona, Spain) |
| TF                          | mouse, IgG1          | 1:250           | Immunocytochemistry                 | Sc-393657, Santa Cruz (Santa Cruz, CA)   |
| PDGFR $\beta$               | rabbit               | 1:100<br>1:1000 | Immunocytochemistry<br>Western blot | Sc-432, Santa Cruz                       |
| pSMAD 2<br>(Ser465/467)     | rabbit               | 1:350<br>1:1000 | Immunocytochemistry<br>Western blot | 3103, Cell Signaling                     |
| ERK 1/2                     | rabbit               | 1:1000          | Western blot                        | 9102, Cell Signaling (Beverly, MA)       |
| GAPDH                       | rabbit, IgG          | 1:1000          | Western blot                        | 2118, Cell Signaling                     |
| pERK 1/2<br>(Thr202/Tyr204) | mouse IgG            | 1:2000          | Western blot                        | 9106, Cell Signaling                     |
| pPDGFR $\beta$ (Tyr716)     | rabbit               | 1:1000          | Western blot                        | Sc-16569, Santa Cruz                     |
| SMAD 2/3                    | rabbit, IgG          | 1:1000          | Western blot                        | 8685, Cell Signaling                     |

**Table S3. Sequences of RT-qPCR primers used in this study**

| <b>Genes</b>          | <b>Forward primer</b> | <b>Reverse primer</b>  |
|-----------------------|-----------------------|------------------------|
| <i>Mmp2</i>           | TATTTGATGGCATCGCTCAG  | ACAGTCCGCCAAATGAACC    |
| <i>Ppia</i>           | TTCATCTGCACTGCCAAGAC  | CACTTTGCCAAACACCACAT   |
| <i>Rplp0</i>          | TCGACAATGGCAGCATCTAC  | GCCAATCTGCAGACAGACAC   |
| <i>Tf</i>             | CAGCCCGGTAGAGTGTATGG  | CCACAGCTCCAATGATGTAGAA |
| <i>Tfpi</i>           | GGTTCACAGCCTTTTTGAAT  | TGGCACGACACAATCCTCT    |
| <i>Timp1</i>          | CTGTTGTTGCTGTGGCTGAT  | AACTTGGCCCTGATGACG     |
| <i>Timp2</i>          | GAAGAGCCTGAACCACAGGT  | CGGGGAGGAGATGTAGCAC    |
| <i>α2-antiplasmin</i> | TGAAACACCAAATGGACCTG  | GGCCTGGAACAACCTCCTG    |
